# Supplementary material
Source: PubMed Central journal article supplement (PMC4259288)
Supplement: NIHMS474862-supplement-1.pdf [file NIHMS474862-supplement-1.pdf]

| Pathology | Colon segment   | Grade  | Stage  | Age | Sex | Type |
|-----------|-----------------|--------|--------|-----|-----|------|
| IBD-Ca    | Ascending       | MD-PD  | T3N0   | 33  | F   | UC   |
| IBD-Ca    | Rectum          | MD     | T3N0Mx | 51  | M   | UC   |
| IBD-Ca    | Cecum           | WD     | T1N0Mx | 38  | M   | UC   |
| IBD-Ca    | Sigmoid         | MD-PD  | T3N0Mx | 58  | F   | UC   |
| IBD-Ca    | Rectum          | PD     | T3NX   | 57  | M   | UC   |
| IBD-Ca    | Rectum          | MD     | T3bN1  | 49  | m   | UC   |
| IBD-Ca    | Rectosigmoid    | PD     | T1N0   | 46  | m   | UC   |
| IBD-Ca    | Sigmoid         | PD     | T3N1   | 63  | m   | UC   |
| IBD-Ca    | Ileocecal valve | WDtoMD | T3N0   | 69  | f   | CR   |
| IBD-Ca    | Rectum          | MDtoPD | T2N0   | 57  | f   | UC   |
| IBD-Ca    | Rectum          | MPD    | T3N2   | 43  | M   | CD   |
| IBD-Ca    | Splenic Flexure | PD     | T3N2   | 72  | F   | CD   |
| IBD-Ca    | Ileocecal valve | MD-PD  | T2N0   | 39  | M   | CD   |
| IBD-Ca    | Rectosigmoid    | MPD    | T3N0   | 38  | M   | UC   |
| IBD-Ca    | Rectum          | PD     | T2N0   | 51  | M   | UC   |
| IBD-Ca    | Transverse      | MD-PD  | T3N2   | 58  | F   | UC   |
| IBD-Ca    | Sigmoid         | MD-PD  | T3N0   | 57  | F   | UC   |
| IBD-Ca    | Rectum          | MD     | T3aN0  | 51  | F   | UC   |
| IBD-Ca    | Rectum          | WD     | T2N1   | 59  | M   | IC   |
| IBD-Ca    | Rectosigmoid    | WD-MD  | T4N2   | 37  | M   | UC   |
| IBD-Ca    | Hepatic Flexure | PD     | T3N0   | 44  | M   | UC   |
| IBD-Ca    | Rectum          | WD-PD  | T3N2   | 53  | F   | UC   |
| IBD-Ca    | Ascending       | MD-PD  | T3N2   | 28  | M   | UC   |
| IBD-Ca    | Hepatic Flexure | WD-PD  | T3aN2  | 27  | M   | UC   |
| IBD-Ca    | Rectosigmoid    | MD     | T4N2   | 59  | F   | UC   |
| IBD-Ca    | Sigmoid         | MD-PD  | T3N0   | 56  | M   | UC   |
| IBD-Ca    | Sigmoid         | MD     | T3N0   | 58  | M   | UC   |
| IBD-Ca    | Cecum           | MD     | T4N1   | 50  | M   | UC   |
| IBD-Ca    | Descending      | MD     | T2N0   | 30  | F   | CD   |
| IBD-Ca    | Rectosigmoid    | MD     | T3N0   | 51  | M   | UC   |
| IBD-Ca    | Transverse      | WD     | T3N0   | 30  | M   | UC   |
| IBD-Ca    | Ascending       | MD     | T3N2   | 44  | F   | IC   |
| IBD-Ca    | Cecum           | PD     | T4N0   | 23  | M   | UC   |
| IBD-Ca    | Rectum          | NA     | T4Nx   | 43  | F   | UC   |
| IBD-Ca    | Rectum          | MD     | T4N1   | 41  | F   | UC   |
| IBD-Ca    | Sigmoid         | WD     | T1N0   | 83  | F   | UC   |
| IBD-Ca    | Rectum          | MD     | T1N0   | 82  | F   | UC   |
| IBD-Ca    | Descending      | WD     | NA     | NA  | NA  | UC   |

**Supplementary Table 1. Summary of clinical data for neoplastic specimens.** IBD-Dys = dysplastic specimens from IBD patients; IBD-Ca = cancer specimens from IBD patients; WD = well differentiated; MD = moderate differentiated; PD = poorly differentiated.
