# Supplementary material
Source: PubMed Central journal article supplement (PMC4259288)
Supplement: NIHMS474862-supplement-2.pdf [file NIHMS474862-supplement-2.pdf]

|                        | IBD-Ca       | IBD-Dys      | IBD          | N-IBD        | N            |
|------------------------|--------------|--------------|--------------|--------------|--------------|
| Age average (range)    | 49.4 (23-83) | 57.4 (47-74) | 46.2 (15-82) | 48.8 (15-82) | 60.6 (41-81) |
| Sex male;female;NA     | 21;16        | 6;4;1        | 23;12        | 16;6;1       | 12;2         |
| IBD type UC;CD;IC      | 3;5;2        | 7;2;2        | 22;12;1      | 16;7         | NA           |
| Location Right;Left;NA | 12;26        | 4;5;2        | 5;30         | 18;4;1       | 26;29        |

**Supplementary Table 2. Summary of clinical data for individual disease groups.**

N=normal from patients without IBD or colorectal cancer history; N-IBD = normal “unaffected” specimens from IBD patients; IBD = “affected” chronically inflamed specimens from IBD patients; IBD-Dys = dysplastic specimens from IBD patients; IBD-Ca = cancer specimens from IBD patients. NA= not available
