# Supplementary material
Source: PubMed Central journal article supplement (PMC4259288)
Supplement: NIHMS474862-supplement-2Figure.pdf [file NIHMS474862-supplement-2Figure.pdf]

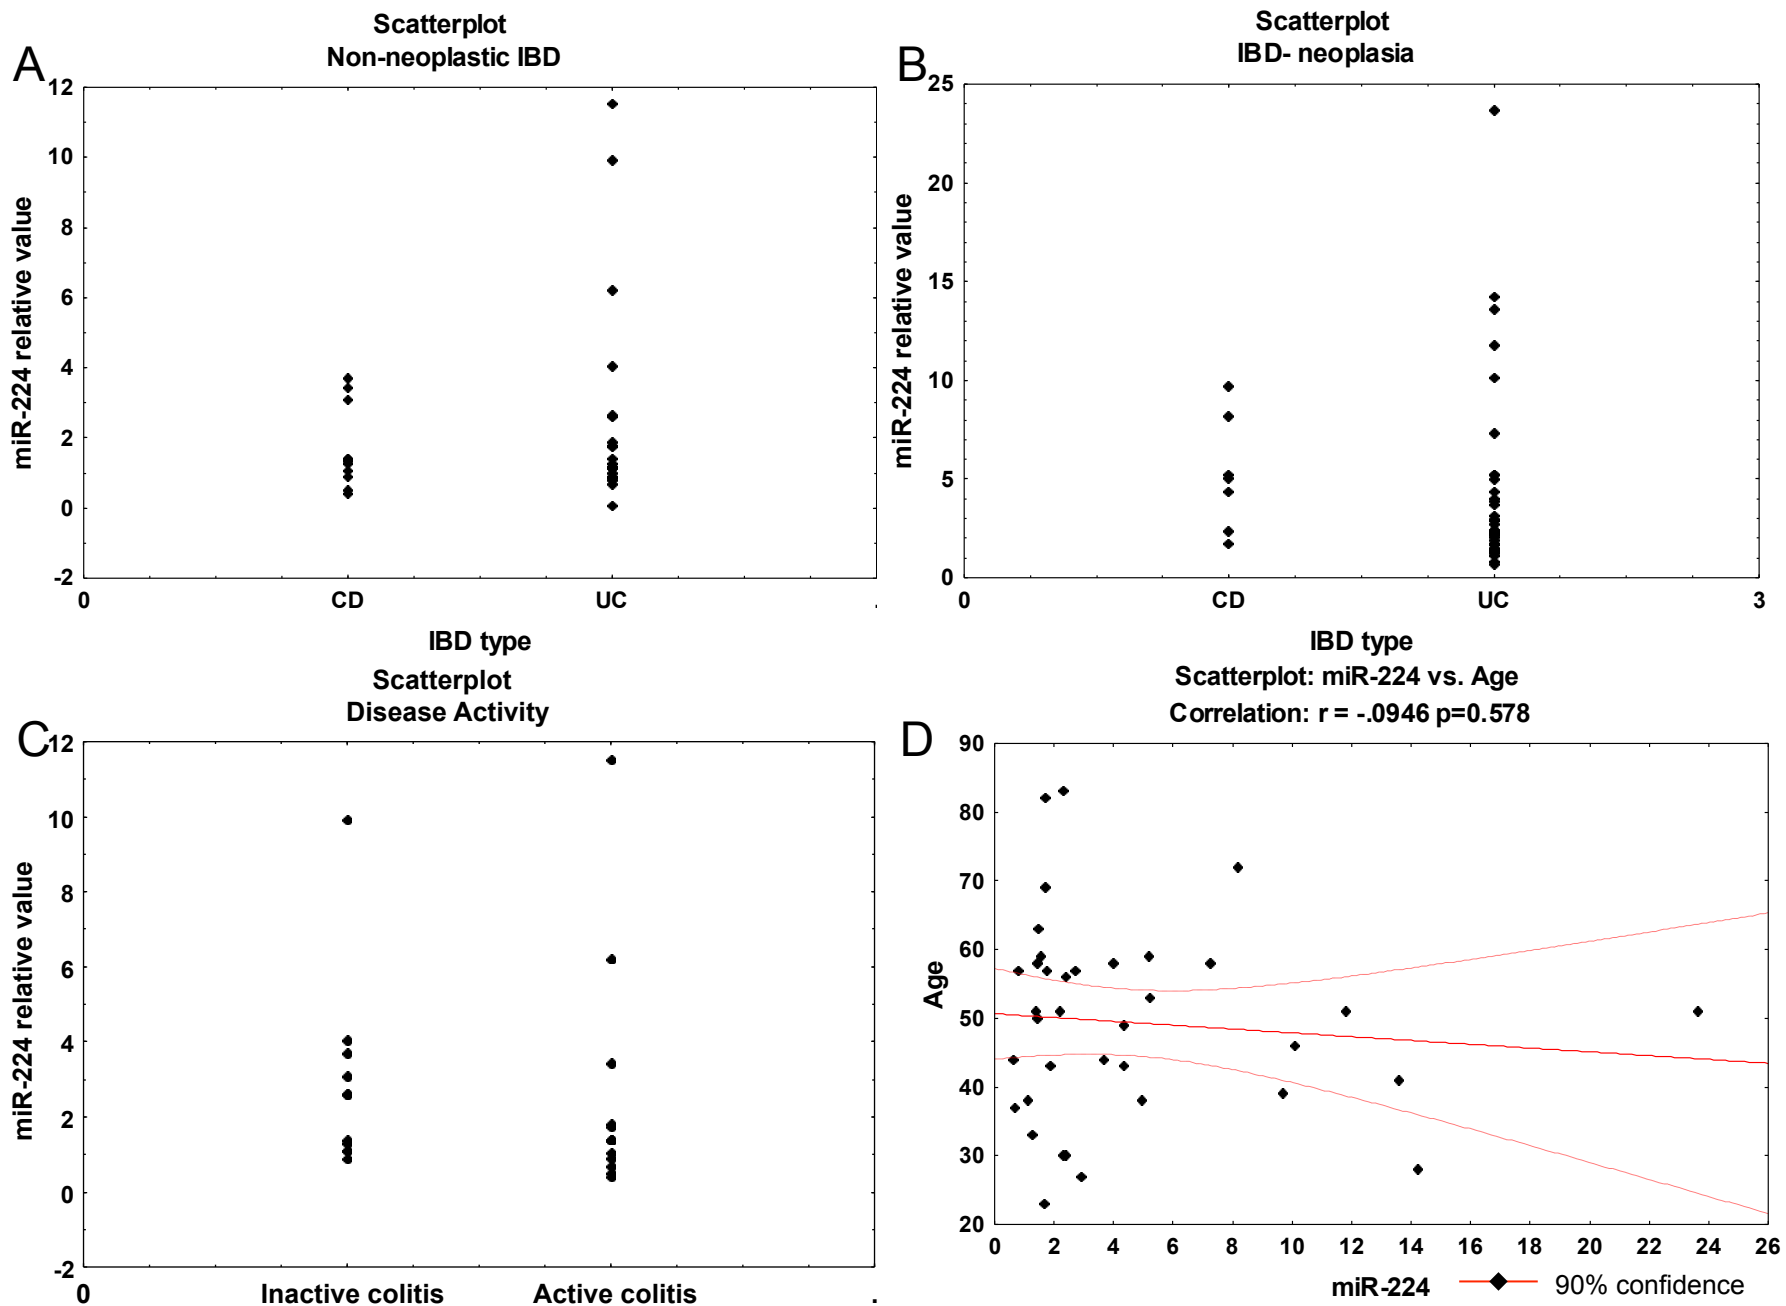

Supplementary Figure 2. A. Comparison of miR-224 status in patients with non-neoplastic CD vs. UC. B. Comparison of miR-224 status in patients with neoplastic Crohn's disease vs. ulcerative colitis. C. Comparison of miR-224 status with respect to disease activity. D. Comparison of miR-224 status with respect to age. UC = ulcerative colitis; CD = Crohn's disease
