# Supplementary material
Source: PubMed Central journal article supplement (PMC4259288)
Supplement: NIHMS474862-supplement-3.pdf [file NIHMS474862-supplement-3.pdf]

| SystematicName  | Fold dif. IBD-Dys vs IBD | p-value IBD-Dys vs IBD | Fold dif. IBD-Ca vs IBD | p-value IBD-Ca vs IBD | Dysregulation         |
|-----------------|--------------------------|------------------------|-------------------------|-----------------------|-----------------------|
| hsa-miR-31      | 5.85                     | 0.0001                 | 7.22                    | 0.0037                | up in IBD-neoplasia   |
| hsa-miR-31*     | 5.94                     | <0.0001                | 6.40                    | 0.0028                | up in IBD-neoplasia   |
| hsa-miR-552     | 6.31                     | 0.0085                 | 6.26                    | 0.0036                | up in IBD-neoplasia   |
| hsa-miR-135b    | 2.88                     | 0.0254                 | 6.05                    | 0.0002                | up in IBD-neoplasia   |
| hsa-miR-200a    | 5.03                     | 0.0102                 | 4.06                    | 0.0196                | up in IBD-neoplasia   |
| hsa-miR-96      | 2.93                     | 0.0125                 | 3.52                    | 0.0135                | up in IBD-neoplasia   |
| hsa-miR-200b*   | 4.60                     | 0.0074                 | 2.90                    | 0.0453                | up in IBD-neoplasia   |
| hsa-miR-424*    | 2.09                     | 0.0407                 | 2.02                    | 0.0080                | up in IBD-neoplasia   |
| hsa-miR-892b    | 3.63                     | 0.0002                 | 6.09                    | <0.0001               | down in IBD-neoplasia |
| hsa-miR-139-5p  | 3.09                     | 0.0033                 | 3.50                    | 0.0096                | down in IBD-neoplasia |
| hsa-miR-501-5p  | 2.25                     | 0.0014                 | 2.81                    | 0.0001                | down in IBD-neoplasia |
| hsa-miR-146b-5p | 2.48                     | 0.0016                 | 2.18                    | 0.0139                | down in IBD-neoplasia |

Supplementary Table 3. miR species dysregulated in both IBD-Dysplasia vs. IBD and IBD-Cancer vs. IBD
