# Supplementary material
Source: PubMed Central journal article supplement (PMC4259288)
Supplement: NIHMS474862-supplement-3Figure.pdf [file NIHMS474862-supplement-3Figure.pdf]

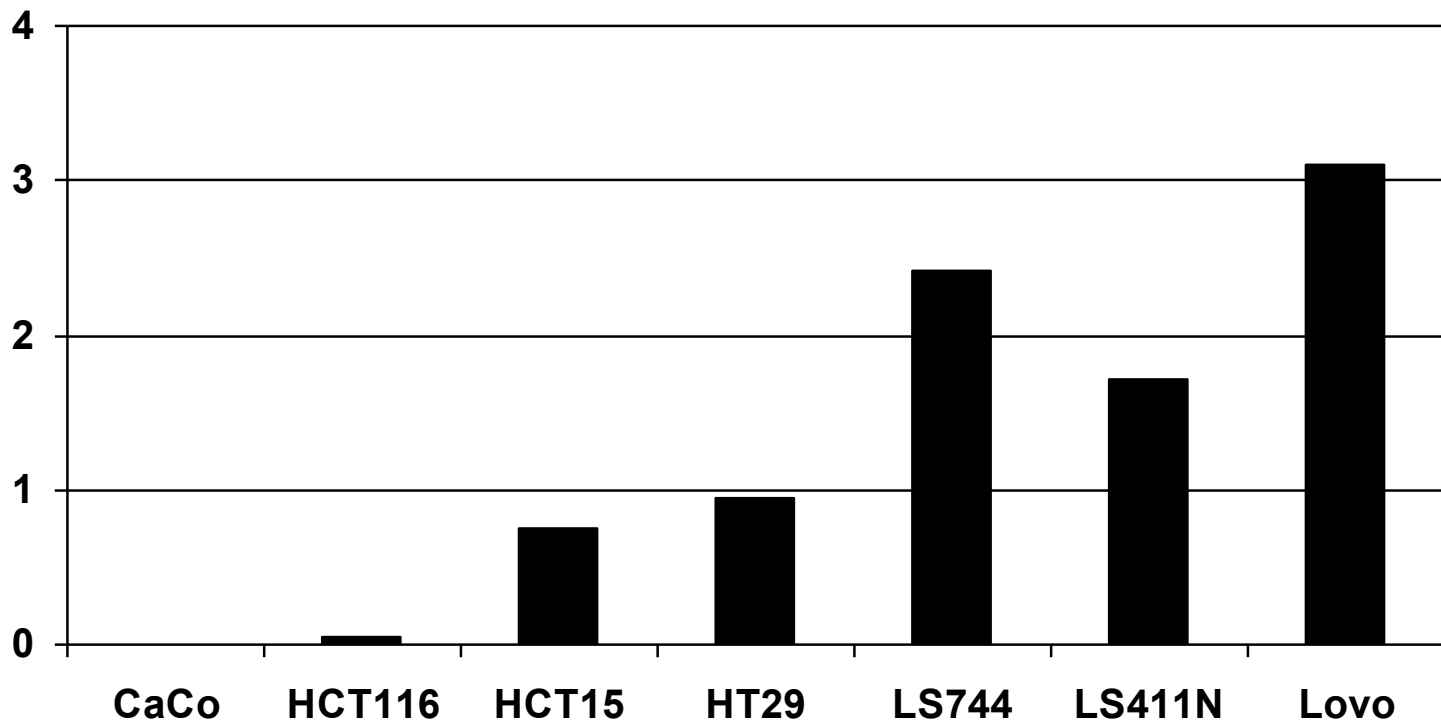

**Supplementary Figure 3 miR-224 expression level in colon cancer cell lines**  
x-axis = colon cancer cell lines; y-axis = miR-224 level.
