# Supplementary material
Source: PubMed Central journal article supplement (PMC4259288)

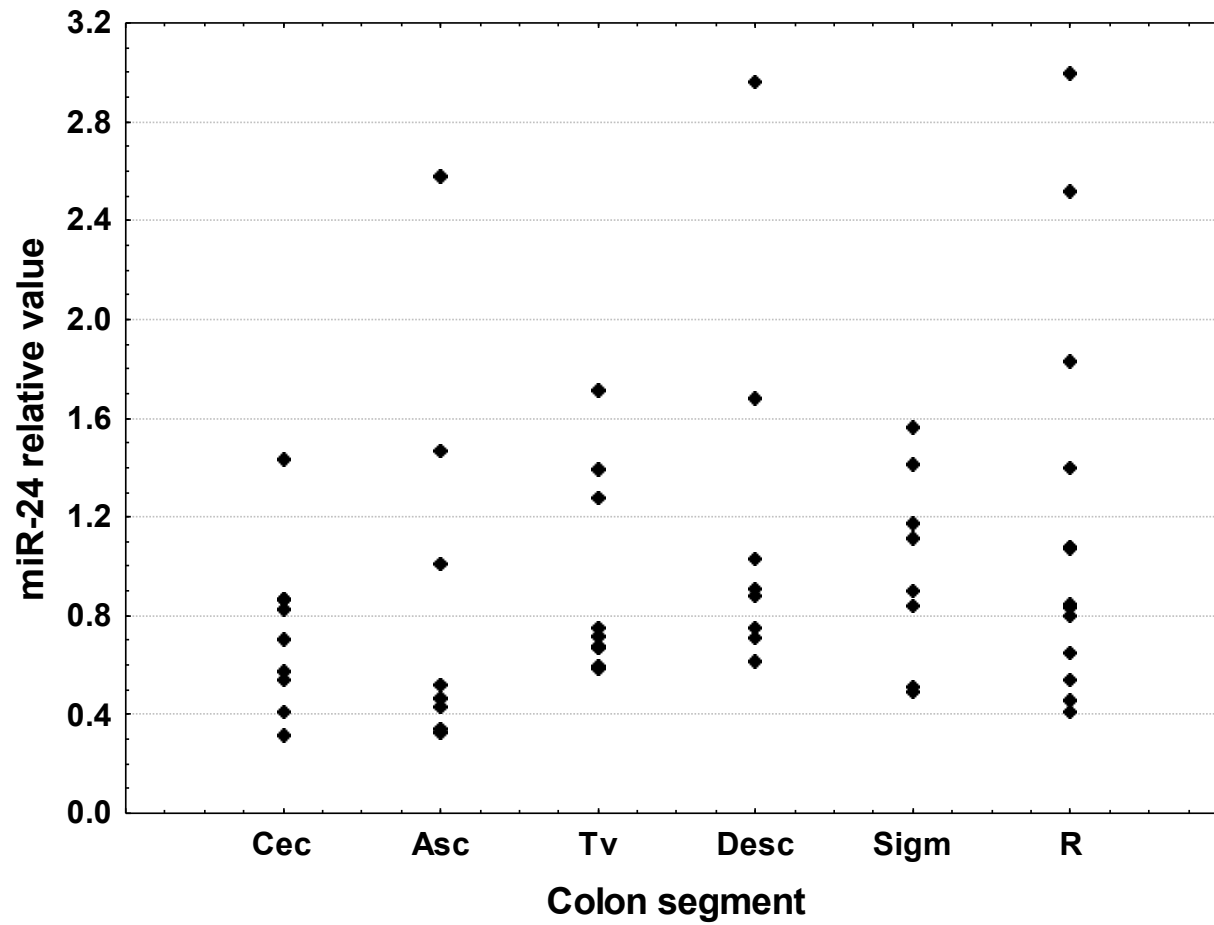

Supplementary Figure 1 miR-224 levels throughout normal colon

Supplement: NIHMS474862-supplement-1Figure.pdf [file NIHMS474862-supplement-1Figure.pdf]
